# Supplementary material for: Loading of Co3O4 onto Pt-modified nitrogen-doped TiO2 nanocomposites promotes photocatalytic hydrogen production
Source: Royal Society of Chemistry journal article supplement (doi:10.1039/c7ra03216a), 2017-01-01
Supplement: c7ra03216a1.pdf [file c7ra03216a1.pdf]

*Supporting Information*

*for*

**Loading of Co<sub>3</sub>O<sub>4</sub> onto Pt-modified Nitrogen-doped TiO<sub>2</sub>  
Nanocomposites Promotes Photocatalytic Hydrogen Production**

Wen-Dong Wei, Xiang-Yu Liu, Shi-Cong Cui\*, and Jin-Gang Liu\*

*Key Laboratory for Advanced Materials, School of Chemistry & Molecular Engineering, East  
China University of Science and Technology, Shanghai, 200237, P. R. China.*

\*Correspondence to: shicongchui@ecust.edu.cn (SCC); liujingang@ecust.edu.cn (JGL)

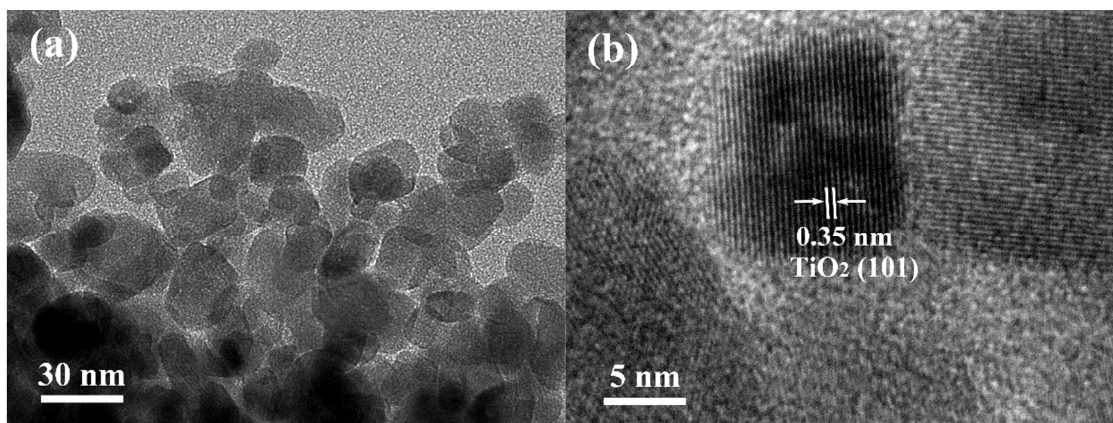

**Fig. S1** TEM (a) and HRTEM (b) images of Pt-N-TiO<sub>2</sub>

The representative TEM and HRTEM images of Pt-N-TiO<sub>2</sub> with 0.02 wt% Pt were present in Figure S1. As shown in Figure S1a, Pt-N-TiO<sub>2</sub> showed homogeneously dispersed nanoparticles without any impurity. The average size of Pt-N-TiO<sub>2</sub> was about 17 nm ranging from 12 to 23 nm. The lattice spacing of Pt-N-TiO<sub>2</sub> in Figure S1b was measured to be 0.35 nm, which corresponds to (101) of anatase TiO<sub>2</sub>. No lattice of Pt was observed because the content of Pt was too low to be detected.

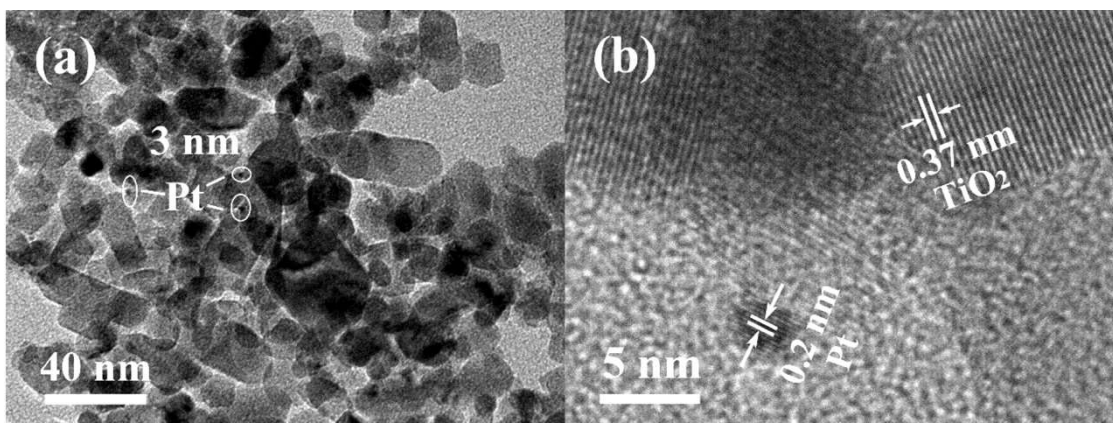

**Fig. S2** TEM (a) and HRTEM (b) images of Pt-Co<sub>3</sub>O<sub>4</sub>(D)/N-TiO<sub>2</sub> with 0.5 wt% Pt

Figure S2 shows the TEM and HRTEM images of PCNT(D) with 0.5 wt% Pt. PCNT(D) has nanoparticles with diameter of about 17 nm. Some small nanoparticles appeared on the surface of TiO<sub>2</sub>, which corresponds to the loaded Pt particles. The uniform lattice fringe of 0.37 nm was assigned to (101) plane of anatase TiO<sub>2</sub>, and the fringes with a spacing of 0.22 nm corresponds to (111) crystal plane of Pt.

**Table S1** Hydrogen evolution of PCNT(D) and PCNT(S) with 0.5 mol% over different Pt contents under **UV-Vis light** irradiation

| <b>H<sub>2</sub> Evolution<br/>(<math>\mu\text{mol g}^{-1} \text{h}^{-1}</math>)</b> | <b>Pt loading = wt%</b> |              |             |             |            |            |
|--------------------------------------------------------------------------------------|-------------------------|--------------|-------------|-------------|------------|------------|
|                                                                                      | <b>0</b>                | <b>0.005</b> | <b>0.01</b> | <b>0.02</b> | <b>0.1</b> | <b>0.2</b> |
| N-TiO <sub>2</sub>                                                                   | 175                     | 1017         | 1878        | 2189        | 4643       | 4911       |
| PCNT(D)                                                                              | 388                     | 2291         | 4521        | 5683        | 5135       | 4728       |
| PCNT(S)                                                                              | 317                     | 1979         | 3969        | 5068        | 4927       | 4484       |

**Table S2** Hydrogen evolution of PCNT(D) and PCNT(S) with 0.5 mol% over different Pt contents under **visible light** irradiation

| <b>H<sub>2</sub> Evolution<br/>(<math>\mu\text{mol g}^{-1} \text{h}^{-1}</math>)</b> | <b>Pt loading = wt%</b> |              |             |             |            |            |
|--------------------------------------------------------------------------------------|-------------------------|--------------|-------------|-------------|------------|------------|
|                                                                                      | <b>0</b>                | <b>0.005</b> | <b>0.01</b> | <b>0.02</b> | <b>0.1</b> | <b>0.2</b> |
| N-TiO <sub>2</sub>                                                                   | 7                       | 64           | 103         | 117         | 200        | 359        |
| PCNT(D)                                                                              | 9.8                     | 90           | 157         | 197         | 206        | 281        |
| PCNT(S)                                                                              | 8.7                     | 80           | 130         | 153         | 177        | 191        |

**Table S3** Hydrogen evolution of PCNT(D) and PCNT(S) with 0.02 wt% of Pt over different Co contents under **Visible light** irradiation

| <b>H<sub>2</sub> Evolution<br/>(<math>\mu\text{mol g}^{-1} \text{h}^{-1}</math>)</b> | <b>Co / Ti</b> |              |             |              |
|--------------------------------------------------------------------------------------|----------------|--------------|-------------|--------------|
|                                                                                      | <b>0.002</b>   | <b>0.005</b> | <b>0.01</b> | <b>0.025</b> |
| PCNT(D)                                                                              | 129            | 197          | 89          | 32           |
| PCNT(S)                                                                              | 94             | 153          | 105         | 29           |

**Table S4** The BET surface areas of PCNT(D) and PCNT(S) with 0.02 wt% over different Co contents

| <b>BET surface area<br/>(<math>\text{m}^2/\text{g}</math>)</b> | <b>Co/Ti</b> |              |              |             |              |
|----------------------------------------------------------------|--------------|--------------|--------------|-------------|--------------|
|                                                                | <b>0</b>     | <b>0.002</b> | <b>0.005</b> | <b>0.01</b> | <b>0.025</b> |
| PCNT(D)                                                        | 63.87        | 65.89        | 63.29        | 57.32       | 65.68        |
| PCNT(S)                                                        | 63.87        | 62.75        | 64.42        | 72.57       | 78.86        |

The BET surface areas of PCNT(D) and PCNT(S) over different Co contents were present in Table S4. As can be seen, there were no distinct variations were observed along with the changing of preparation methods and Co contents, suggesting that the differences of photocatalytic performances were less related to the BET surface areas.
